# Supplementary material
Source: publisher figshare collection journal article supplement (https://acs.figshare.com/ndownloader/files/14460395)
Supplement: Supplementary file 1 [file 14460395]

# Influence of Interfacial Gas Enrichment on Controlled Coalescence of Oil Droplets in Water in Microfluidics

Jianlong Wang,<sup>a</sup> Adrian J. T. Teo,<sup>b</sup> Say H. Tan,<sup>b</sup> Geoffrey M. Evans,<sup>c</sup> Nam-Trung Nguyen,<sup>b</sup> Anh V. Nguyen<sup>\*a</sup>

<sup>a</sup>School of Chemical Engineering, The University of Queensland, Brisbane, Queensland 4072, Australia

<sup>b</sup>Queensland Micro- and Nanotechnology Centre, Griffith University, Brisbane, Queensland 4111, Australia

<sup>c</sup>School of Engineering, The University of Newcastle, Callaghan, New South Wales 2308, Australia

\*Corresponding authors

E-mail addresses: anh.nguyen@eng.uq.edu.au (A. V. Nguyen)

## SUPPORTING INFORMATION

The Hamaker-Lifshitz theory as described Eqs. (2) – (7) requires the full dielectric spectra of squalene<sup>1</sup> and water<sup>2</sup> to compute the Hamaker constant. We express the frequency of squalene and water dielectric spectra using the photon energy (eV) which is the frequency multiplied by the Planck constant ( $2\pi\hbar$ ) as per the Planck-Einstein relation. Figure S1 shows the most recent spectra of squalene and water with possible extrapolations that are subject to the  $f$ -sum rule.

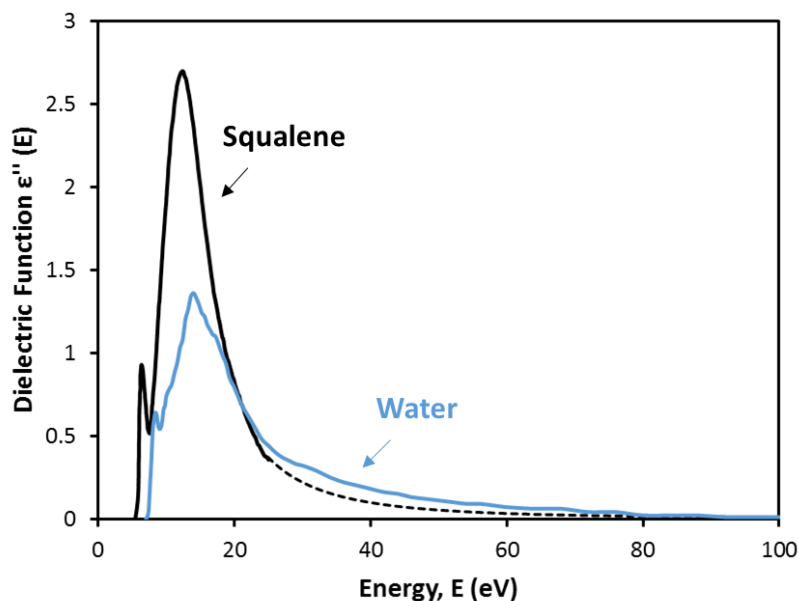

**Figure S1.** Dielectric spectra  $\varepsilon''$  (solid lines) for squalene (black) and water (blue) with extrapolations:  $\varepsilon''(E) = 3725.23E^{-2.86}$  for squalene (broken line) and  $\varepsilon''(E) = 10705.08E^{-2.95}$  for water after 100 eV. Both extrapolations are subjected to the  $f$ -sum rule, i.e.

$$\int_0^{\infty} E \varepsilon''(E) dE = \frac{\pi}{2} E_p^2, \text{ where } E_p = 19.98 \text{ eV for squalene and } E_p = 21.44 \text{ eV for water at } 25^\circ\text{C}.$$

$\varepsilon(i\omega)$  in Eqs. (2) - (7) is extracted from the imaginary part  $\varepsilon''$  of dielectric function by a Kramers-Kronig relation<sup>3</sup> for the computation of van der Waals interactions:

$$\varepsilon(i\xi) = 1 + \frac{2}{\pi} \int_0^\infty \frac{x \varepsilon''(x)}{x^2 + \xi^2} dx \quad (\text{S1})$$

where  $x$  is the integration dummy for the real frequency. Figure S2 shows the values of  $\varepsilon(i\omega)$  calculated from  $\varepsilon''$  versus index,  $n$ , of sampling frequency.

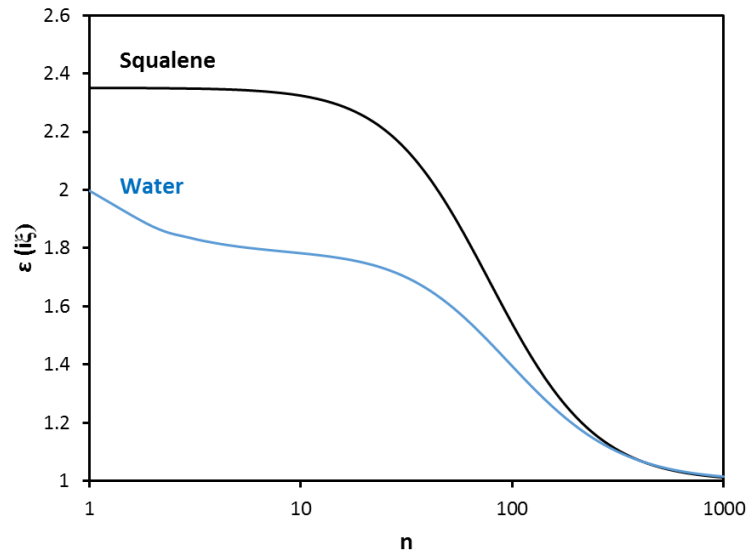

**Figure S2.** The values of  $\varepsilon(i\omega)$  calculated from  $\varepsilon''$  versus index,  $n$ , of sampling frequency.

Dielectric constants are:  $\varepsilon(0) = 2.35$  for squalene and  $\varepsilon(0) = 78.46$  for water.

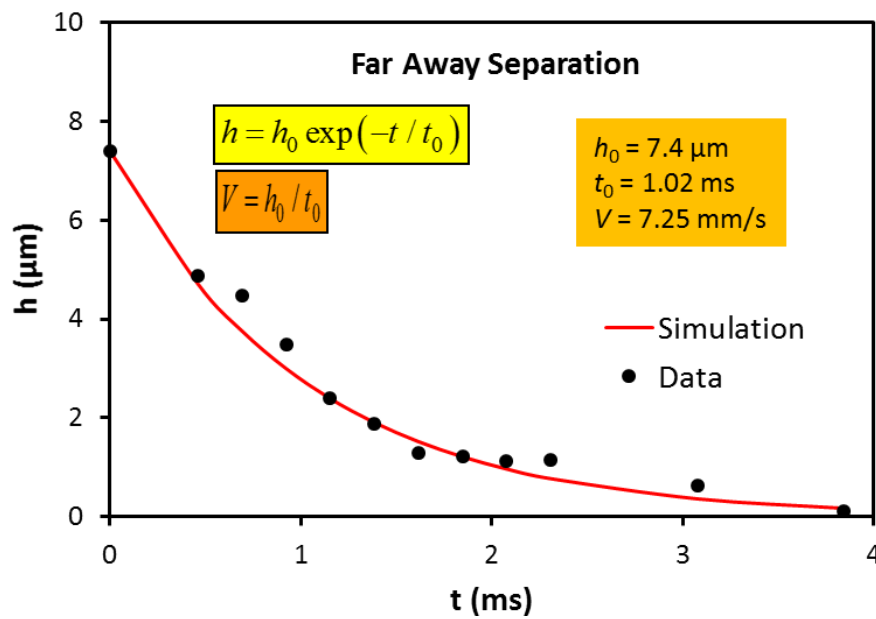

**Figure S3.** Determination of  $V$  and  $t_0$  for the boundary condition of Eq. (10).

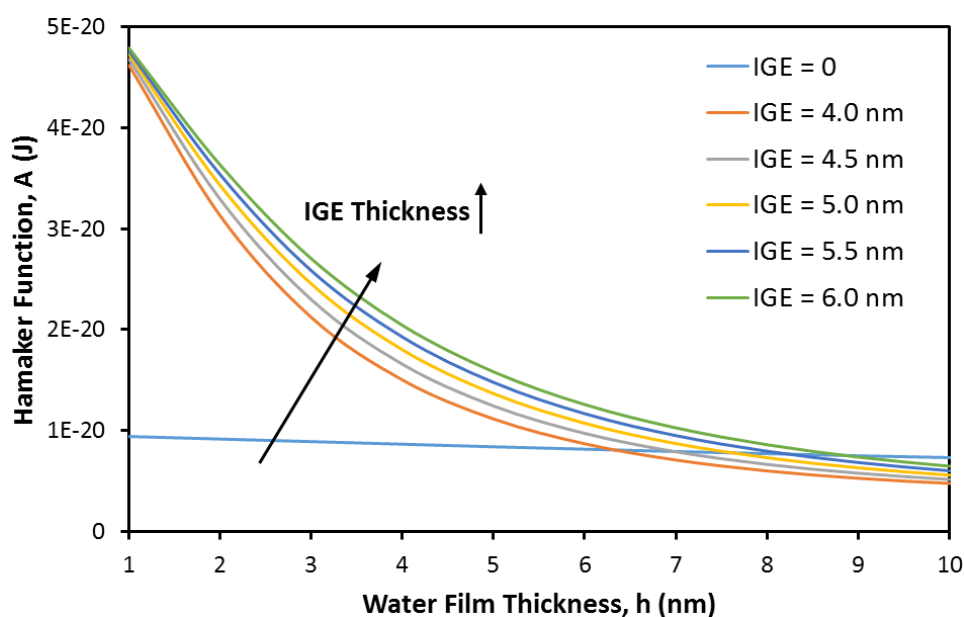

**Figure S4.** Increased Hamaker function with IGE thickness.

## Reference

1. Painter, L. R.; Attrey, J. S.; Jr., H. H. H.; Birkhoff, R. D., Vacuum ultraviolet optical properties of squalane and squalene. *Journal of Applied Physics* **1984**, 55 (3), 756-759.
2. Hayashi, H.; Hiraoka, N., Accurate measurements of dielectric and optical functions of liquid water and liquid benzene in the VUV region (1–100 eV) using small-angle inelastic X-ray scattering. *The Journal of Physical Chemistry B* **2015**, 119 (17), 5609-5623.
3. Landau, L. D.; Lifshitz, E. M., Chapter IX - The Electromagnetic Wave Equations. In *Electrodynamics of Continuous Media (Second Edition Revised and Enlarged)*, Pergamon: Amsterdam, 1984; Vol. 8, pp 257-289.
